# Supplementary material for: Achieving high-performance planar perovskite solar cells with co-sputtered Co-doping NiOxhole transport layers by efficient extraction and enhanced mobility
Source: Royal Society of Chemistry journal article supplement (doi:10.1039/c6tc03624d), 2016-01-01
Supplement: c6tc03624d1.pdf [file c6tc03624d1.pdf]

*Supporting Information for*

**Achieving high-performance planar perovskite solar cells with  
co-sputtered Co-doping NiO<sub>x</sub> hole transport layers by efficient  
extraction and enhanced mobility**

A. B. Huang,<sup>a,b</sup> J. T. Zhu,<sup>a,b</sup> J. Y. Zheng,<sup>c</sup> Y. Yu,<sup>a,b</sup> Y. Liu,<sup>a</sup> S. W. Yang,<sup>d</sup> S.H. Bao,<sup>a</sup> L. Lei,<sup>a\*</sup> and P. Jin<sup>a,e\*</sup>

- a) State Key Laboratory of High Performance Ceramics and Superfine Microstructure, Shanghai Institute of Ceramics, Chinese Academy of Sciences, Dingxi 1295, Changning, Shanghai, 200050, China
- b) University of Chinese Academy of Sciences, Yuquan 19, Shijingshan, Beijing, 100049, China
- c) State Key Laboratory of Solid Lubrication, Lanzhou Institute of Chemical Physics, Chinese Academy of Sciences, Lanzhou 730000, China
- d) CAS Key Laboratory of Materials for Energy Conversion, Shanghai Institute of Ceramics, Chinese Academy of Sciences, Heshuo 588, Jiading, Shanghai, 201899, China.
- e) National Institute of Advanced Industrial Science and Technology (AIST), Moriyama, Nagoya 463-8560, Japan

## Experimental Section

### Substrates prepare and ETL deposition

FTO glasses used as transparent conductive substrates were ultrasonically cleaned by detergent reagent, deionized water, acetone and ethanol successively for 15 minutes and then dried by pressurized air flow. Electron selective TiO<sub>2</sub> films with different crystallinity were directly deposited on FTO glasses by a DC reactive magnetron sputtering system (Shenyang Tengao Vacuum Technology Co. Ltd., JSS-600) with a titanium target (99.99% purity) at room temperature. In our experiment, the angle between the target and the substrates was fixed at 37° and the substrate rotation speed was 15 rpm during the deposition process. The base pressure of the deposition chamber was kept at  $4 \times 10^{-4}$  Pa and the work pressure was around 1.5 Pa. DC magnetron sputtering was conducted at a sputtering power range of 500 - 700 W and a fixed gas mixture flow atmosphere composed of 35 sccm Ar and 5 sccm O<sub>2</sub>. By adjusting the work pressure and sputtering power, distinctive films could be obtained with certain thicknesses. Prior to the deposition process, the Ti target was pre-sputtered for 10 min in order to eliminate the residual oxide layer.

### Synthesis of CH<sub>3</sub>NH<sub>3</sub>I powder

Methylamine iodide (CH<sub>3</sub>NH<sub>3</sub>I) was synthesized and purified on the basis of a reported method. 30 mL methylamine (33%wt in ethanol, Sigma-Aldrich) were mixed with 28 mL hydroiodic acid (57% in water, Sigma-Aldrich) in a 250 mL round-bottomed flask at 0°C in ice bath and reacted for 2 h with stirring. The solvent was then removed with a rotary evaporator by heating the solution at 60 °C under reduced pressure, during which white powder precipitated. The product was washed with diethyl ether for three times, and then dissolved in ethanol, recrystallized with diethyl ether, and finally dried in a vacuum oven at 60 °C for 24 h.

### Fabrication of perovskite solar cells

CH<sub>3</sub>NH<sub>3</sub>PbI<sub>3</sub> films around 300 nm were prepared with a reported method. Firstly, PbI<sub>2</sub> (Aladdin, 99.8%) and as-prepared CH<sub>3</sub>NH<sub>3</sub>I with a molar ratio of 1:1 were dissolved in anhydrous N, N-dimethylformamide (DMF, SCRC, 99.5%) and stirred at room temperature for 2 h to yield perovskite precursor solution. The solution was spin coated on the TiO<sub>2</sub> surface at 4000 rpm for 20 s, during which 500 μL chlorobenzene was dripped to the surface at 7 s. The as cast films were calcined on a hot plate (100 °C) for 30 min to remove residual solvent and crystallize the perovskite.

Thereafter, a hole-transporting layer was deposited onto the perovskite film by spin coating at 4000 rpm for 30 s. The solution recipe was 72.3 mg spiro-OMeTAD (Merk), 17.5 μL lithium-bis(trifluoromethanesulfonyl)imide (Li-TFSI, J&K scientific Ltd.) stock solution (520 mg/mL Li-TFSI in acetonitrile) and 28.5 μL 4-tert-butylpyridine (TBP, Sigma Aldrich) in 1 mL chlorobenzene (Sigma Aldrich). Finally, 120 nm-thick silver acting as the back contact was thermally evaporated on top of the hole transporting layer through a metal shadow mask, with an active area of 0.07 cm<sup>2</sup>

## Device characterization

Scanning electron microscopy (SEM) was conducted with a field emission scanning electron microscope (FEI, Magellan 400) to investigate the morphology and thickness of ETL. High resolution transmission electron microscopy (HRTEM, JEM2010, JEOL, Tokyo, Japan) was used to verify the crystalline existence of partly crystallized TiO<sub>2</sub> films. The surface roughness of the films was obtained by atomic force microscopy (AFM, SII Nano Technology Ltd., Nanonavi) in noncontact mode. The chemical composition and valence-band (VB) spectrum of the TiO<sub>2</sub> films were analyzed by X-ray photoelectron spectroscopy (XPS) with monochromated Al K $\alpha$  radiation at a pass energy of 29.4 eV. X-ray diffraction (XRD) measurements were performed with a Ultima IV X-ray diffractometer using Cu K $\alpha$  radiation under operation conditions of 40 kV and 40 mA, with a scanning speed of 5° per minute. The UV-vis transmittance spectra of TiO<sub>2</sub> films were recorded on UV-Vis spectrophotometer (HITACHI U-3010). Steady photoluminescence (PL) measurements were conducted at room temperature on a Horiba-Ltd. FluoroMax-4 device with an excitation wavelength of 457 nm. Time-resolved PL spectra were measured using a fluorescence lifetime spectrometer (Photo Technology International, Inc.). The PL lifetime of the CH<sub>3</sub>NH<sub>3</sub>Pb<sub>3</sub>I films on TiO<sub>2</sub>/FTO glass substrates were calculated by fitting the experimental decay transient data with bi-exponential decay model. Current -voltage characteristics of solar cells were measured under simulated AM1.5G illumination of 100 mW/cm<sup>2</sup>. The light intensity was calibrated with a reference silicon solar cell (Oriel-91150). The J-V curves were respectively measured by applying an external voltage bias with a scan rate of 40 mV/s. Incident photon-to-current conversion efficiency (IPCE) was measured on a SM-250 system (Bunkoh-keiki, Japan). The intensity of monochromatic light was measured with a Si photodiode (S1337-1010BQ).

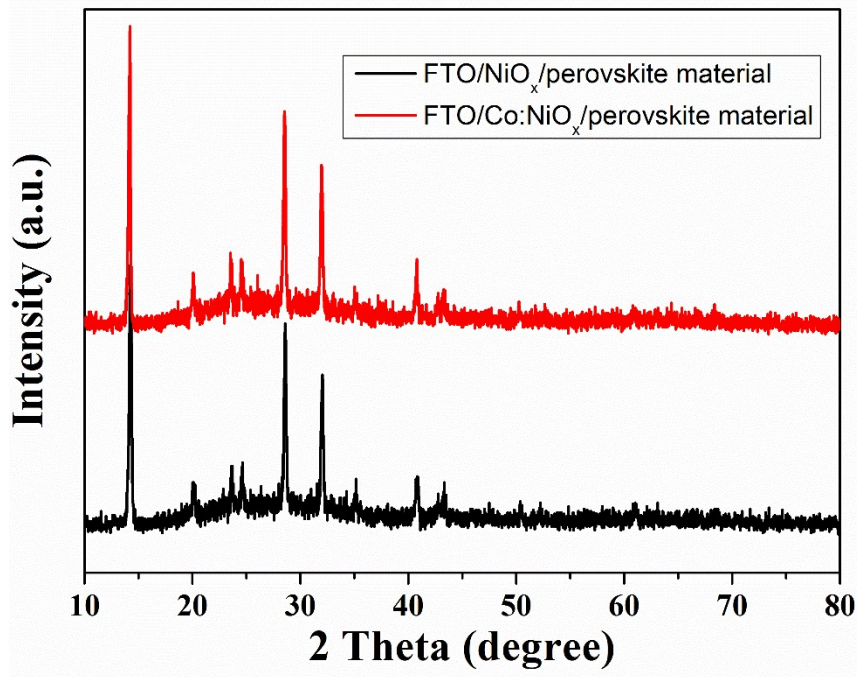

**Fig. S1** The XRD patterns of perovskite absorber material ( $\text{CH}_3\text{NH}_3\text{PbI}_3$ ) based on different hole transport layers.

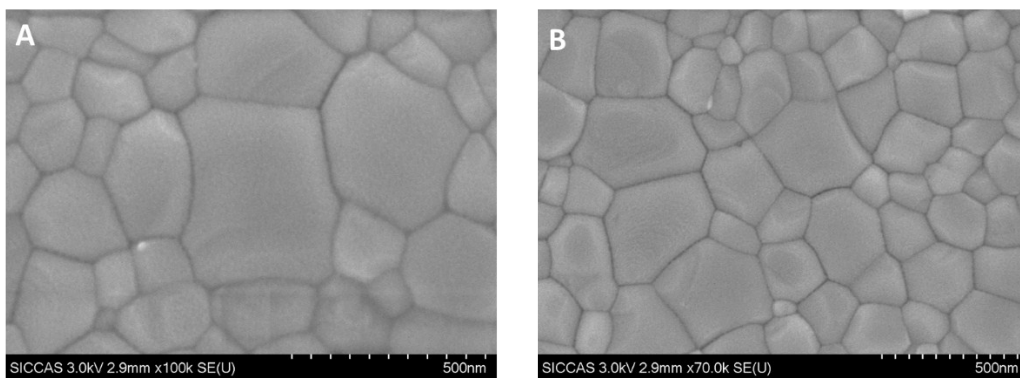

**Fig. S2** Top view SEM images of perovskite absorber material ( $\text{CH}_3\text{NH}_3\text{PbI}_3$ ) based on  $\text{NiO}_x$  (A) and  $\text{Co:NiO}_x$  (B) layers.

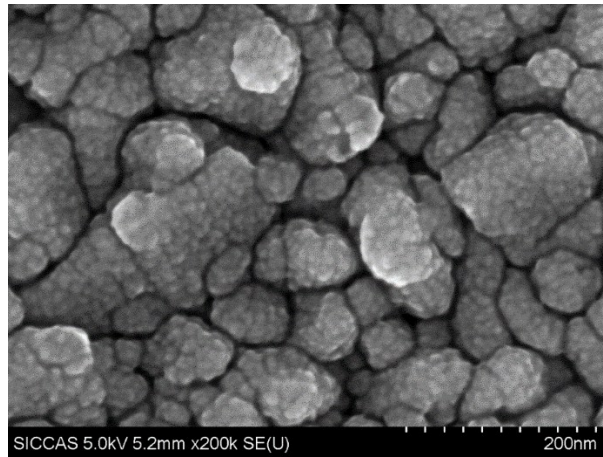

**Fig. S3** Top view SEM image of NiO<sub>x</sub> layer.

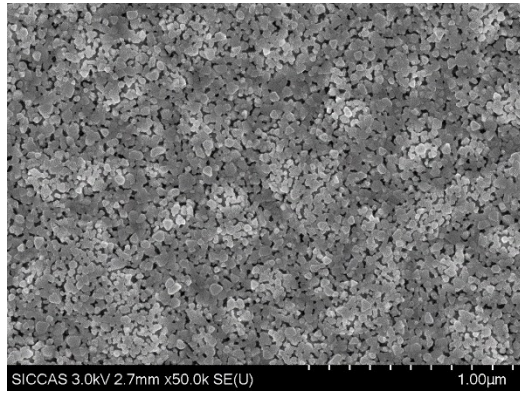

**Fig. S4** Top view SEM image of NiO<sub>x</sub> on FTO substrate via solution processed method

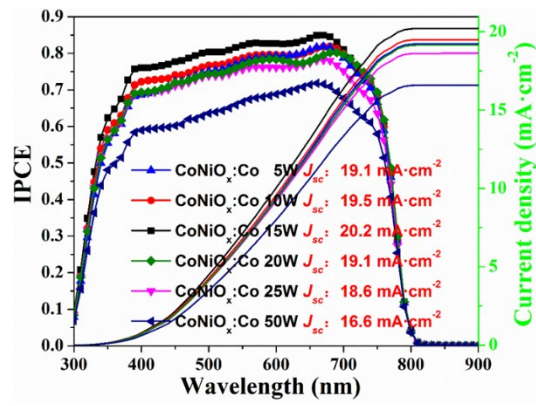

**Fig. S5** Incident photon-to-current conversion efficiency (IPCE) spectra and the corresponding integration photocurrent of the device based on Co:NiO<sub>x</sub> HTLs as doping power was 5W, 10W, 15W, 20W, 25W and 50W, respectively.



Table S1 The photovoltaic parameters of the PSCs based on NiO<sub>x</sub> HTLs with different sputtering time.

| <b>Devices</b> | <b>V<sub>oc</sub> (V)</b> | <b>J<sub>sc</sub> (mA cm<sup>-2</sup>)</b> | <b>FF (%)</b> | <b>PCE (%)</b> |
|----------------|---------------------------|--------------------------------------------|---------------|----------------|
| 1 min          | 1.012                     | 16.49                                      | 49.27         | 8.22           |
| 2 min          | 1.008                     | 18.80                                      | 54.76         | 9.60           |
| 3 min          | 1.028                     | 16.46                                      | 51.33         | 8.69           |
| 4 min          | 0.964                     | 14.44                                      | 49.92         | 6.94           |

Table S2 The photovoltaic parameters of the PSCs based on Co:NiO<sub>x</sub> HTLs with different doping power loaded on Cu target.

| <b>Devices</b> | <b>V<sub>oc</sub> (V)</b> | <b>J<sub>sc</sub> (mA cm<sup>-2</sup>)</b> | <b>FF (%)</b> | <b>PCE (%)</b> |
|----------------|---------------------------|--------------------------------------------|---------------|----------------|
| 5 W            | 1.008                     | 18.76                                      | 58.08         | 9.63           |
| 10 W           | 1.012                     | 19.38                                      | 61.08         | 11.12          |
| 15 W           | 1.010                     | 20.02                                      | 63.35         | 12.63          |
| 20 W           | 1.011                     | 18.88                                      | 61.44         | 10.52          |
| 25 W           | 1.009                     | 17.97                                      | 58.92         | 9.86           |
| 50 W           | 1.006                     | 15.32                                      | 50.06         | 6.89           |

Table S3 The contents of elements in Co:NiO<sub>x</sub> film based on Si substrate.

| Element       | Line Type | Apparent Concentration | k Ratio | Wt %  | Wt % Sigma | Atomic % |
|---------------|-----------|------------------------|---------|-------|------------|----------|
| <b>O</b>      | K series  | 0.5                    | 0.00169 | 10.25 | 0.21       | 19.79    |
| <b>Si</b>     | K series  | 2.51                   | 0.01991 | 57.58 | 0.45       | 63.3     |
| <b>Ni</b>     | K series  | 1.2                    | 0.01198 | 31.66 | 0.49       | 16.65    |
| <b>Co</b>     | K series  | 0.02                   | 0.00019 | 0.51  | 0.19       | 0.27     |
| <b>Total:</b> |           |                        |         | 100   |            | 100      |
